# Supplementary material
Source: HighWire-hosted journal article supplement (http://www.ajnr.org/highwire/filestream/77679/field_highwire_adjunct_files/0/20-00080.pdf)
Supplement: 20-00080.pdf [file 20-00080.pdf]

**On-line Table 1: Information about the patients included in this study**

| Patient No. | Age (yr) | Sex | Category of Compression               | Patient No. | Age (yr) | Sex | Category of Compression     |
|-------------|----------|-----|---------------------------------------|-------------|----------|-----|-----------------------------|
| 1           | 70       | M   | Disk herniation                       | 29          | 55       | M   | OPLL, OLF                   |
| 2           | 62       | F   | OPLL                                  | 30          | 60       | F   | Disk herniation             |
| 3           | 58       | M   | Disk herniation, OPLL                 | 31          | 60       | M   | Disk herniation             |
| 4           | 70       | M   | Disk herniation                       | 32          | 64       | M   | Disk herniation             |
| 5           | 62       | F   | Disk herniation                       | 33          | 54       | M   | Disk herniation             |
| 6           | 55       | M   | Disk herniation, OPLL                 | 34          | 61       | F   | Disk herniation, OPLL       |
| 7           | 62       | F   | OPLL                                  | 35          | 58       | F   | OPLL                        |
| 8           | 50       | F   | OPLL                                  | 36          | 60       | F   | Disk herniation             |
| 9           | 55       | F   | Disk herniation                       | 37          | 54       | M   | OPLL, spinal canal stenosis |
| 10          | 44       | M   | Disk herniation                       | 38          | 66       | M   | Disk herniation             |
| 11          | 49       | M   | Disk herniation                       | 39          | 63       | F   | Disk herniation             |
| 12          | 47       | F   | Disk herniation                       | 40          | 69       | M   | OPLL                        |
| 13          | 58       | M   | Disk herniation                       | 41          | 59       | M   | OPLL                        |
| 14          | 62       | F   | Disk herniation                       | 42          | 67       | M   | Disk herniation             |
| 15          | 60       | M   | Disk herniation                       | 43          | 57       | M   | Disk herniation             |
| 16          | 66       | M   | Disk herniation                       | 44          | 58       | M   | Disk herniation             |
| 17          | 70       | M   | Disk herniation                       | 45          | 62       | M   | Disk herniation             |
| 18          | 71       | F   | Disk herniation                       | 46          | 52       | M   | OPLL                        |
| 19          | 66       | M   | OPLL                                  | 47          | 60       | M   | Disk herniation             |
| 20          | 48       | M   | Disk herniation                       | 48          | 59       | F   | Disk herniation, OPLL       |
| 21          | 72       | F   | Disk herniation                       | 49          | 58       | F   | Disk herniation             |
| 22          | 35       | M   | OPLL                                  | 50          | 51       | F   | Disk herniation             |
| 23          | 54       | M   | Disk herniation                       | 51          | 57       | M   | Disk herniation             |
| 24          | 57       | M   | Disk herniation, cervical spondylosis | 52          | 60       | F   | OPLL                        |
| 25          | 53       | F   | OPLL                                  | 53          | 68       | M   | Disk herniation             |
| 26          | 59       | M   | Disk herniation                       | 54          | 59       | F   | Disk herniation, OPLL       |
| 27          | 54       | M   | Disk herniation                       | 55          | 72       | F   | OPLL                        |
| 28          | 61       | M   | Disk herniation                       |             |          |     |                             |

**Note:**—OPLL indicates ossification of the posterior longitudinal ligament; OLF, ossification of the ligamentum flavum.

**On-line Table 2: Correlation between the DTI metrics of the dorsal column at the C2 level with mJOA before surgery and with the mJOA recovery rate**

| DTI Metrics                          | Correlation |         |
|--------------------------------------|-------------|---------|
|                                      | Coefficient | P Value |
| Correlation with mJOA before surgery |             |         |
| MD                                   | −0.005      | .971    |
| AD                                   | 0.264       | .07     |
| RD                                   | −0.136      | .357    |
| FA                                   | 0.233       | .111    |
| Correlation with mJOA recovery rate  |             |         |
| MD                                   | 0.043       | .772    |
| AD <sup>a</sup>                      | 0.341       | .018    |
| RD                                   | −0.101      | .493    |
| FA                                   | 0.220       | .132    |

<sup>a</sup>Significant correlation.
